# Supplementary material for: The decomposition of α-LiN2H3BH3: an unexpected hydrogen release from a homopolar proton–proton pathway
Source: Royal Society of Chemistry journal article supplement (doi:10.1039/c4ta02842b), 2014-07-16
Supplement: c4ta02842b1.pdf [file c4ta02842b1.pdf]

## The Decomposition of $\alpha$ -LiN<sub>2</sub>H<sub>3</sub>BH<sub>3</sub>: an Unexpected Hydrogen Release from a Homopolar Proton–Proton Pathway

Yingbin Tan,<sup>a†</sup> Xiaowei Chen,<sup>ab†</sup> Jie Chen,<sup>a</sup> Qinfen Gu<sup>c</sup> and Xuebin Yu<sup>a\*</sup>

<sup>a</sup> *Department of Materials Science, Fudan University, Shanghai 200433, China;*

*Phone and Fax: +86-21-5566 4581. E-mail: [yuxuebin@fudan.edu.cn](mailto:yuxuebin@fudan.edu.cn)*

<sup>b</sup> *School of Science, Jimei University, Xiamen 361021, China*

<sup>c</sup> *Australian Synchrotron, Clayton, Victoria 3168, Australia*

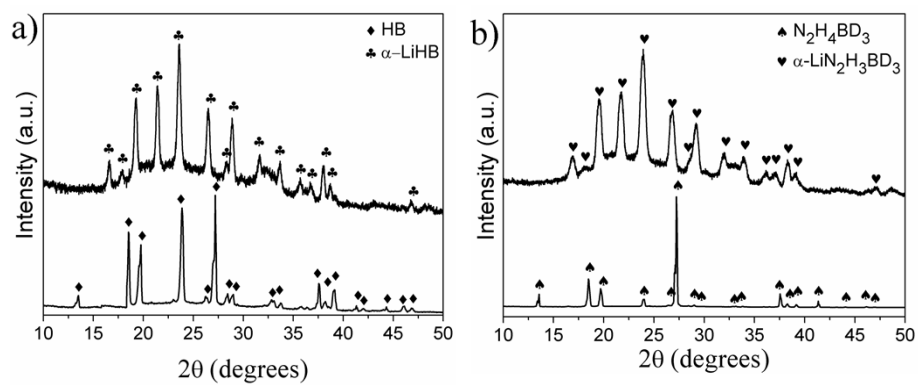

**Fig. S1** XRD patterns of HB and  $\alpha$ -LiN<sub>2</sub>H<sub>3</sub>BH<sub>3</sub> (a), N<sub>2</sub>H<sub>3</sub>BD<sub>3</sub> and  $\alpha$ -LiN<sub>2</sub>H<sub>3</sub>BD<sub>3</sub> (b).

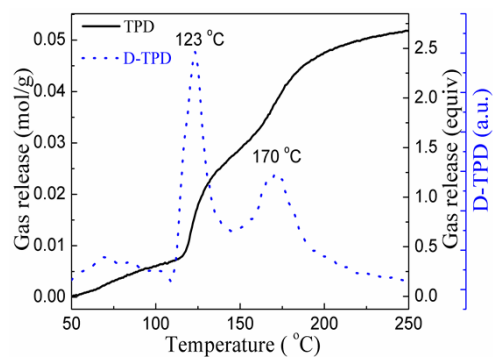

**Fig. S2** Non-isothermal TPD curve and its differential curve (D-TPD) with a heating rate of 5  $^{\circ}\text{C}$   $\text{min}^{-1}$  for the decomposition of  $\alpha$ -LiHB.

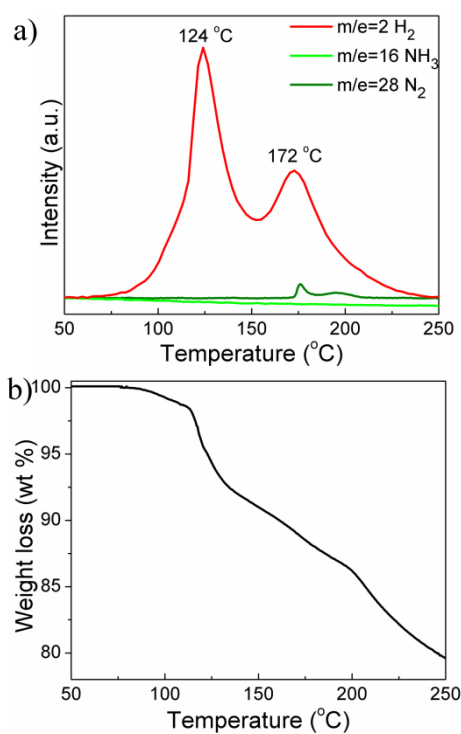

**Fig. S3** a) MS and b) TG profiles of  $\alpha$ -LiHB with a heating rate of  $5\text{ }^{\circ}\text{C min}^{-1}$  in argon.

The dehydrogenation properties of  $\alpha$ -LiHB were investigated using Temperature-Programmed Desorption (TPD) and thermogravimetry analysis/mass spectroscopy (TG/MS) measurements with a heating rate of  $5\text{ }^{\circ}\text{C min}^{-1}$  as shown in Fig. S2 and S3. The TPD and TG/MS results are in good agreement with the previous reports.

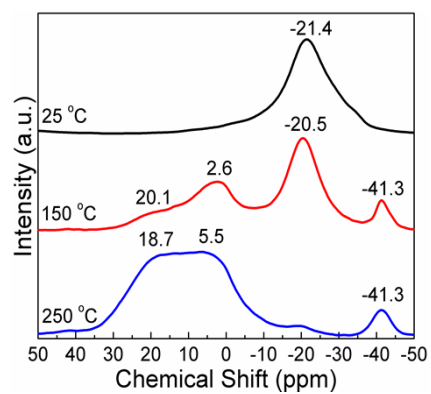

**Fig. S4**  $^{11}\text{B}$  NMR results for  $\alpha\text{-LiHB}$  before and after heating to 150 °C and 250 °C.
